# Supplementary material for: A method employing SPE, MRM LC-MS/MS and a THF–water solvent system for the simultaneous determination of five antiretroviral drugs in human blood plasma
Source: Royal Society of Chemistry journal article supplement (doi:10.1039/c6ay02442d), 2016-12-21
Supplement: c6ay02442d1.pdf [file c6ay02442d1.pdf]

## A Method Employing SPE, MRM LC-MS/MS and a THF-Water solvent system for the Simultaneous Determination of Five Antiretroviral Drugs in Human Blood Plasma

Elliott Mwando Jr,<sup>a</sup> Amos Masele,<sup>b</sup> Enoch Sepako<sup>b</sup> and Kwenga Sichilongo<sup>\*a</sup>

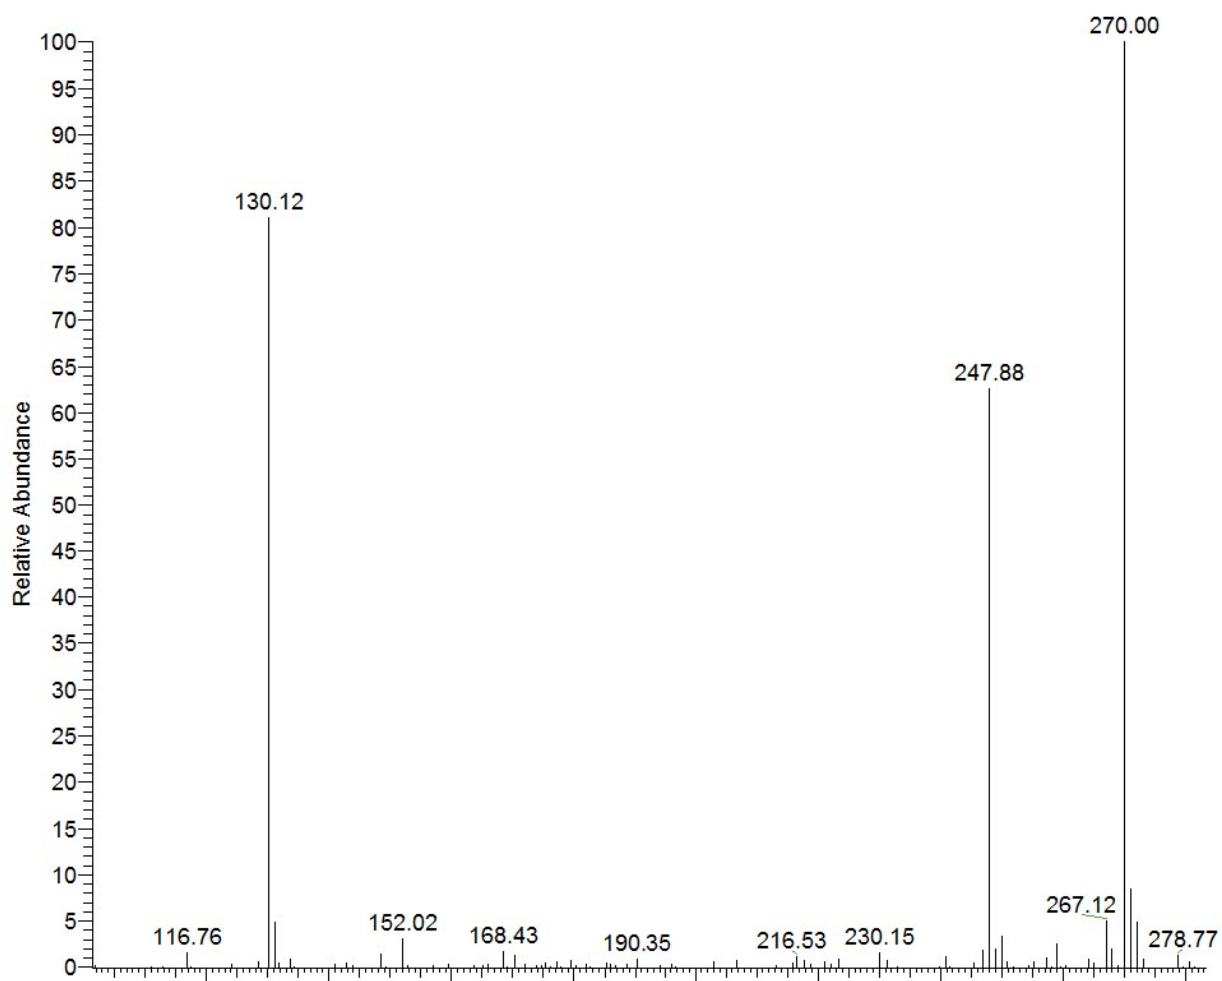

**Fig. S1.** ESI mass spectrum of emtricitabine (EMT)

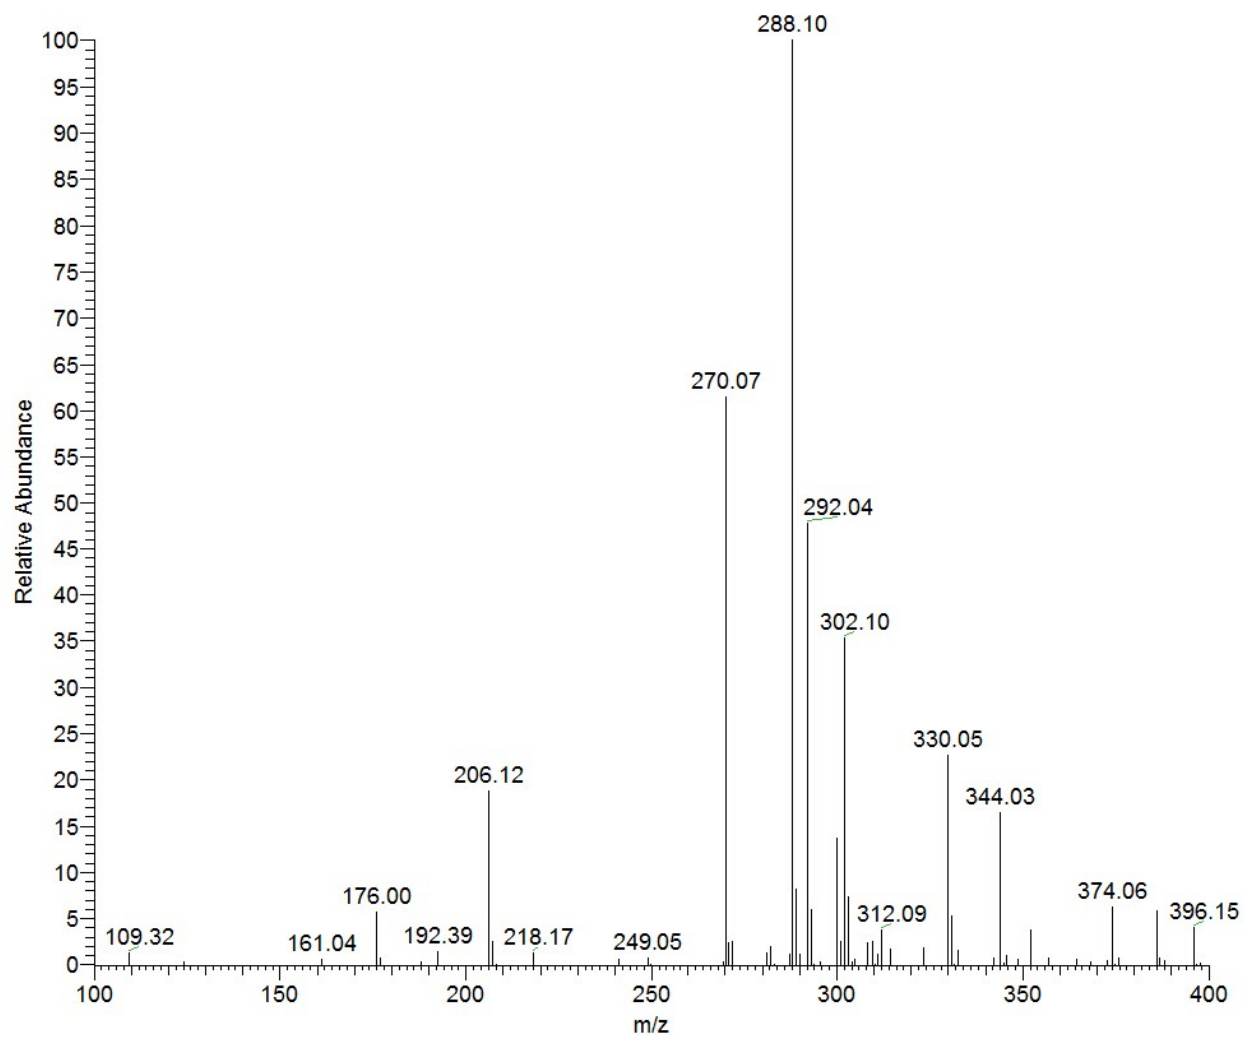

**Fig. S2.** ESI mass spectrum of tenofovir (TFV)

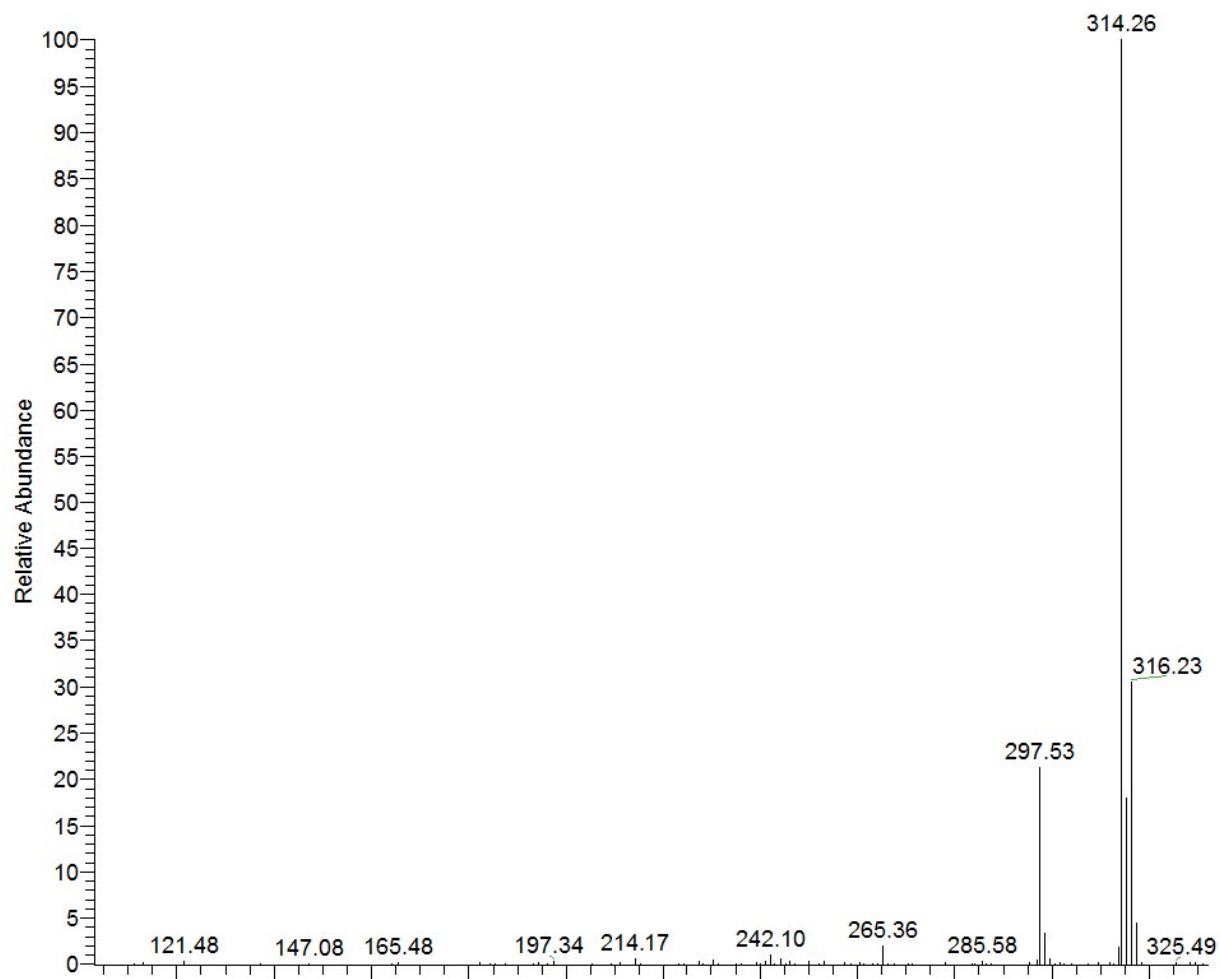

**Fig. S3.** ESI mass spectrum of efavirenz (EFZ)

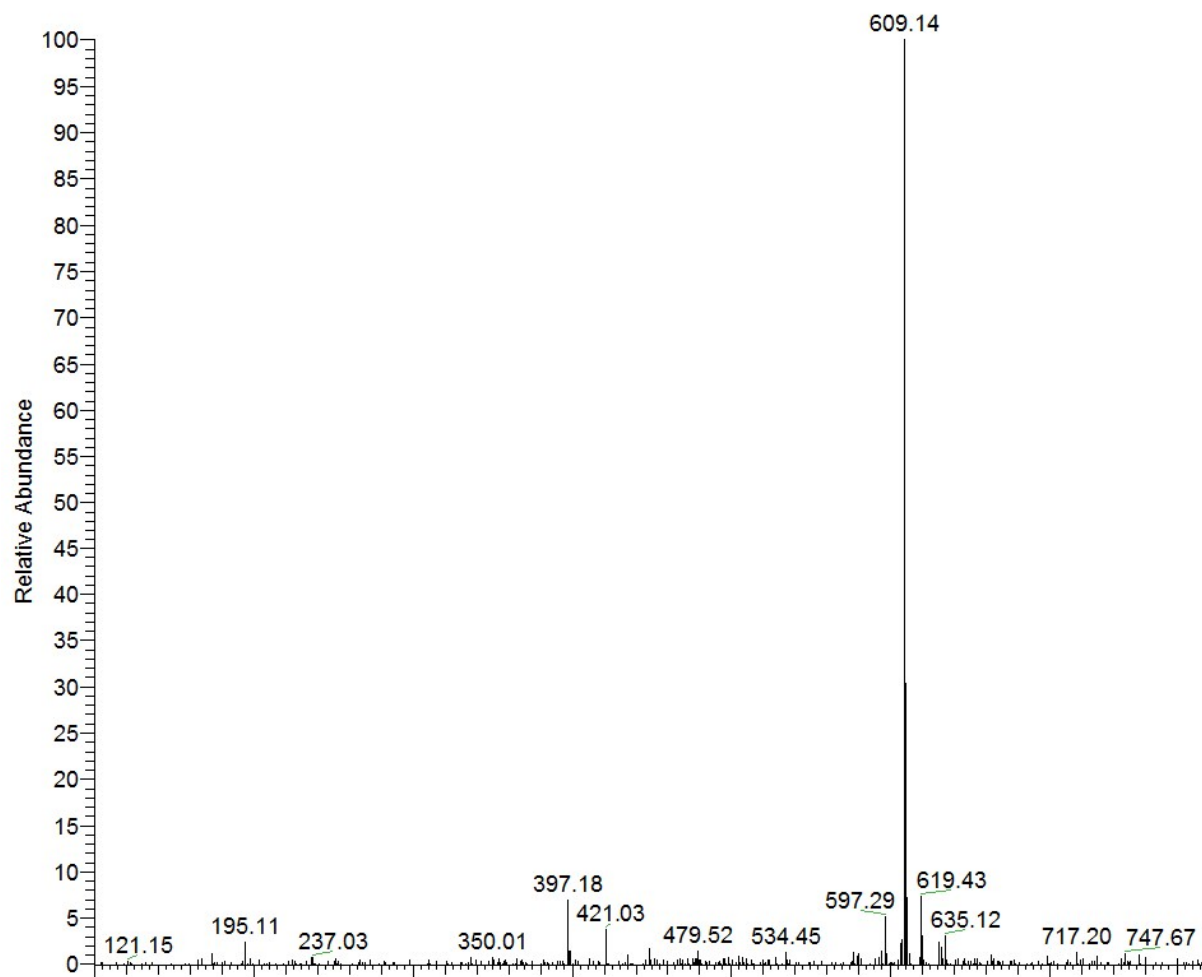

**Fig. S4.** ESI mass spectrum of reserpine (RSP)

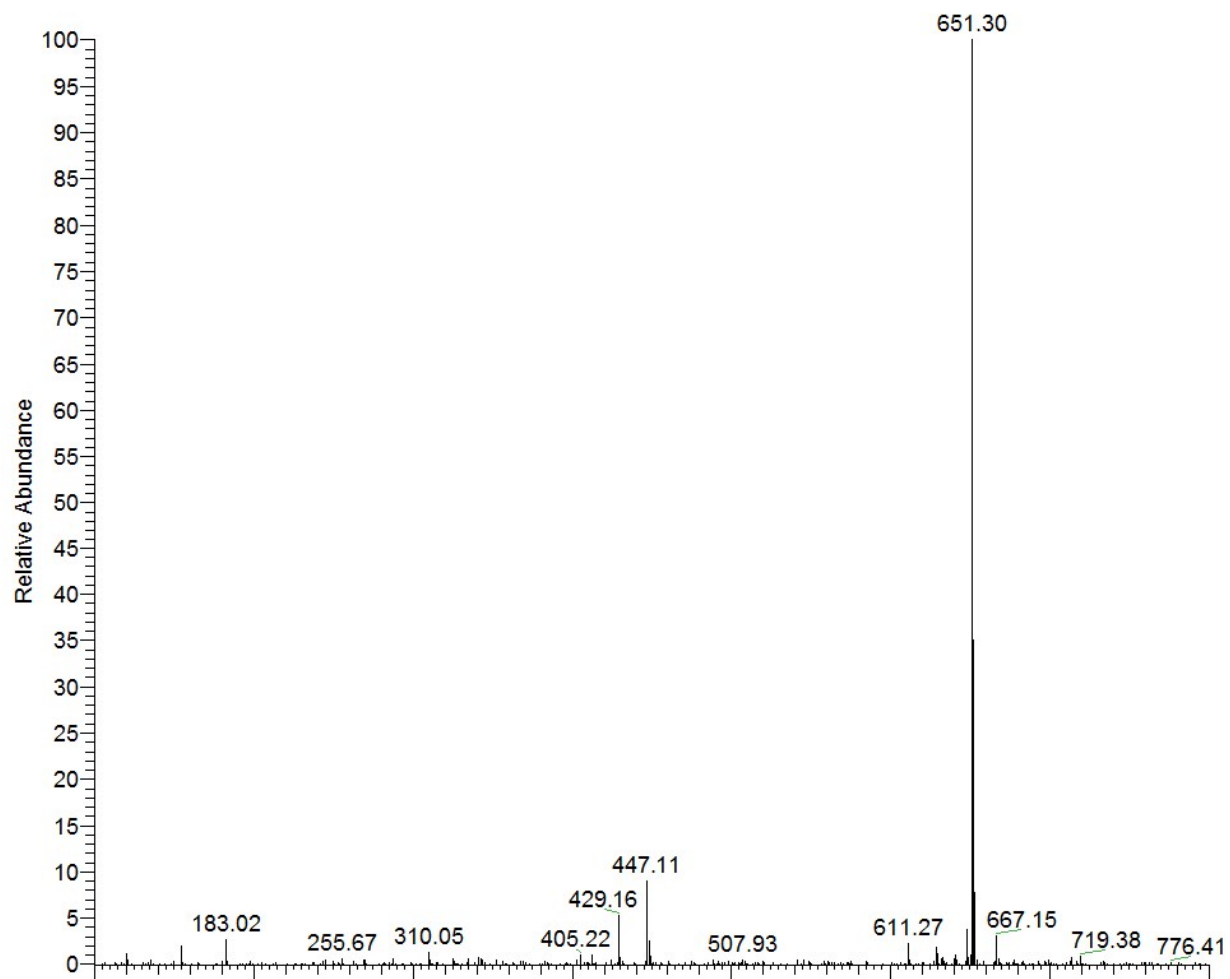

**Fig. S5.** ESI mass spectrum of lopinavir (LPV)

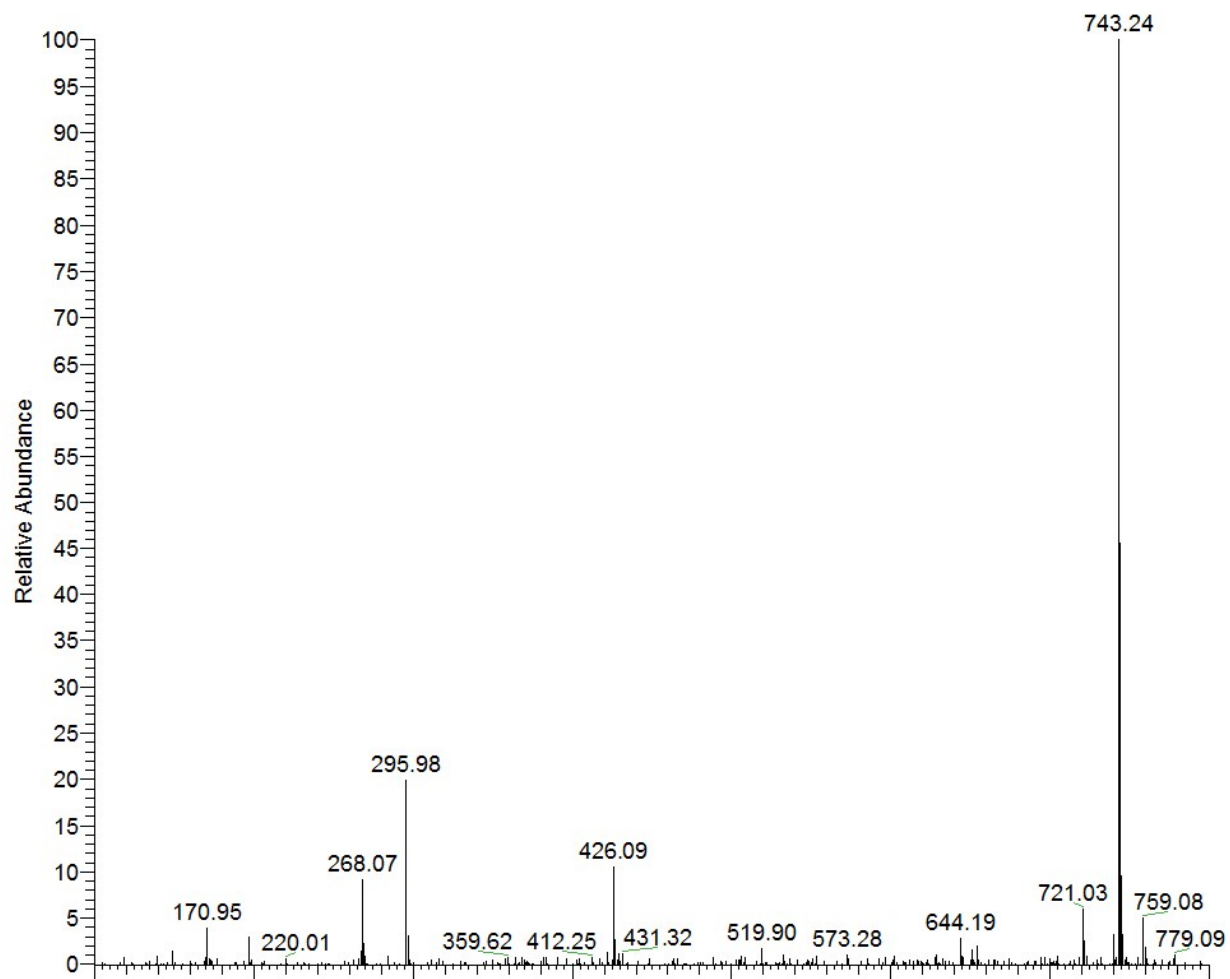

**Fig. S6.** ESI mass spectrum of rotinavir (RTV)
